# Supplementary material
Source: publisher figshare collection journal article supplement (https://geolsoc.figshare.com/articles/dataset/_/3453575)
Supplement: Supplementary file 1 [file 1]

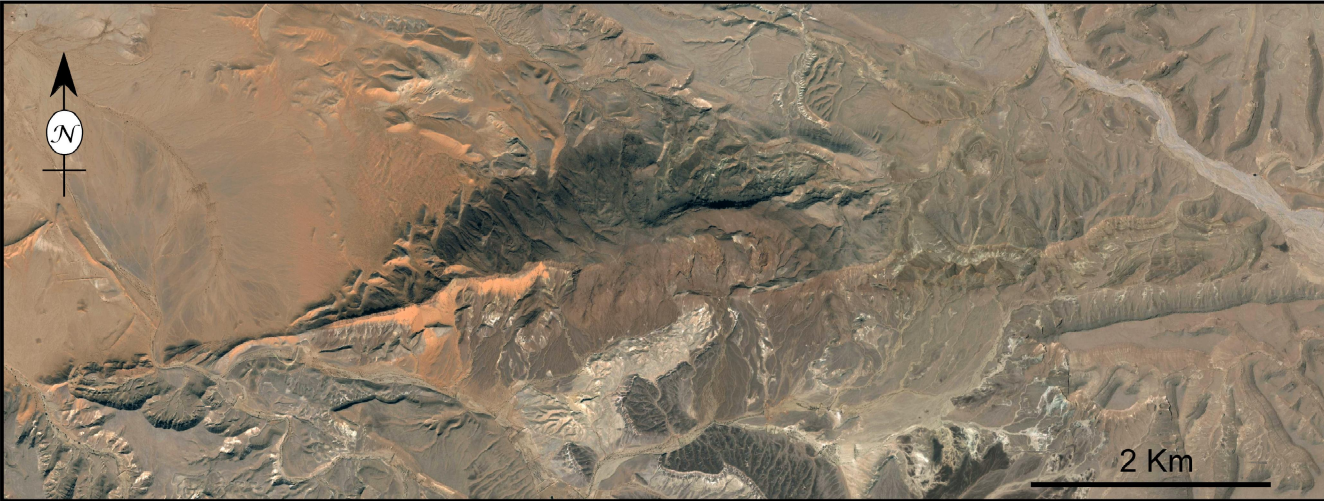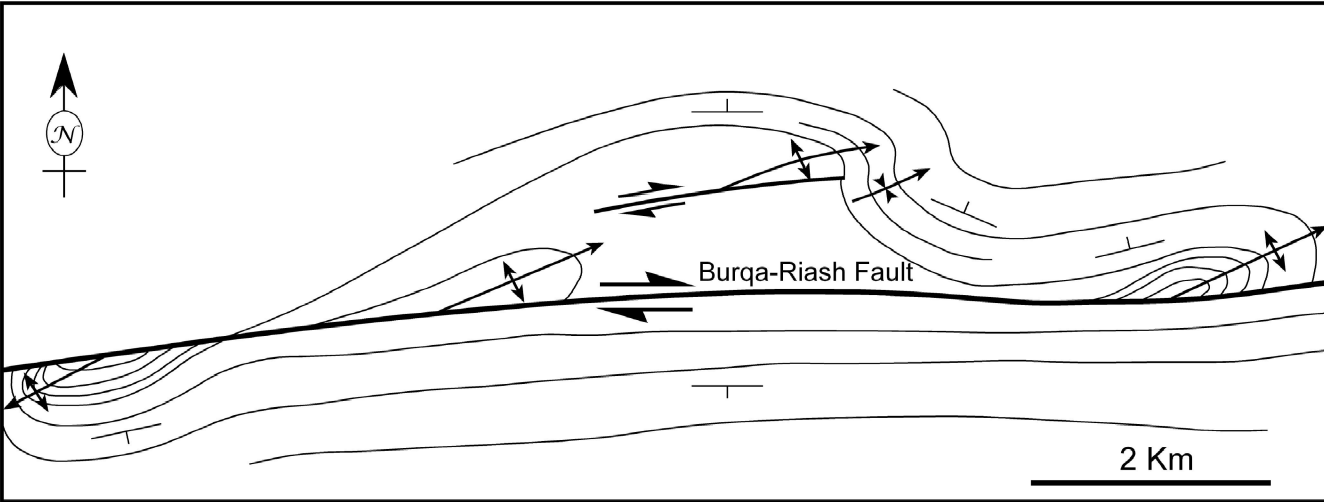

Fig. 4. Landsat TM image and structural form-line map of the Burqa-Riash Fault showing deformation of the Upper Cretaceous rocks on both sides of the fault in response to the dextral slip.
