# Supplementary material
Source: publisher figshare collection journal article supplement (https://geolsoc.figshare.com/articles/dataset/_/3453575)
Supplement: Supplementary file 4 [file 1]

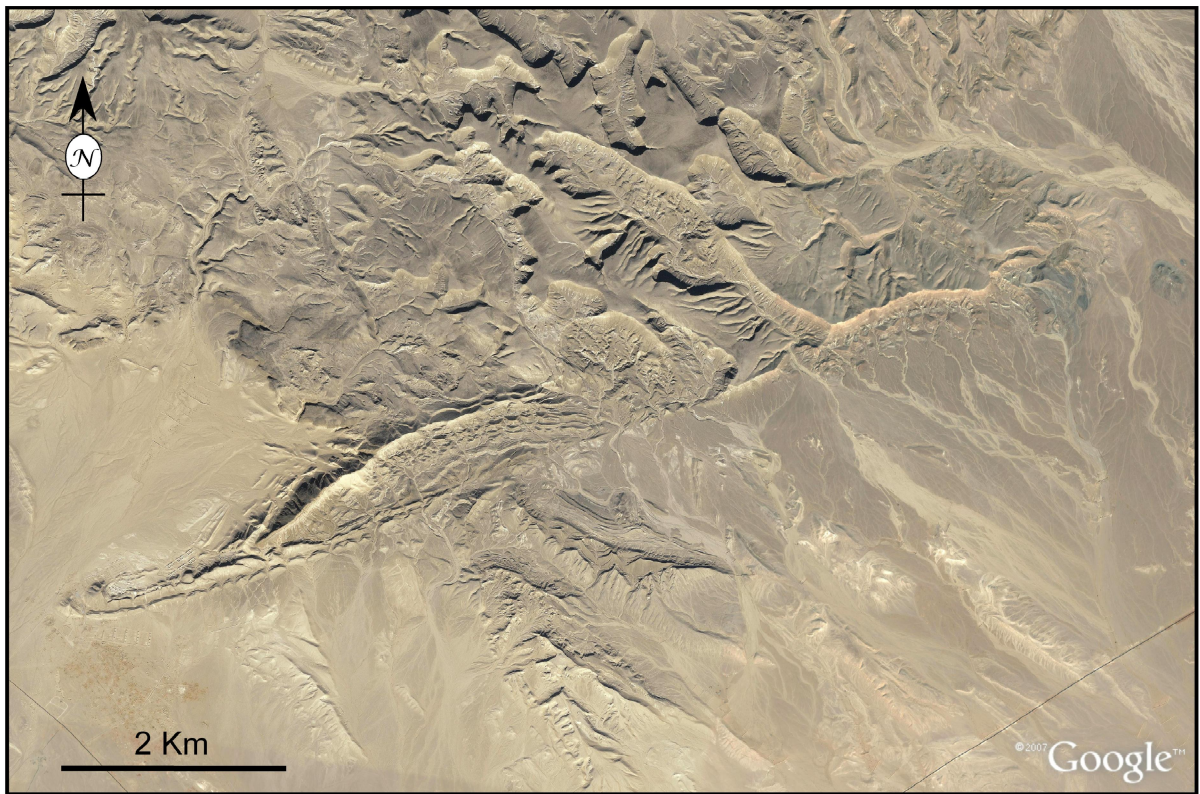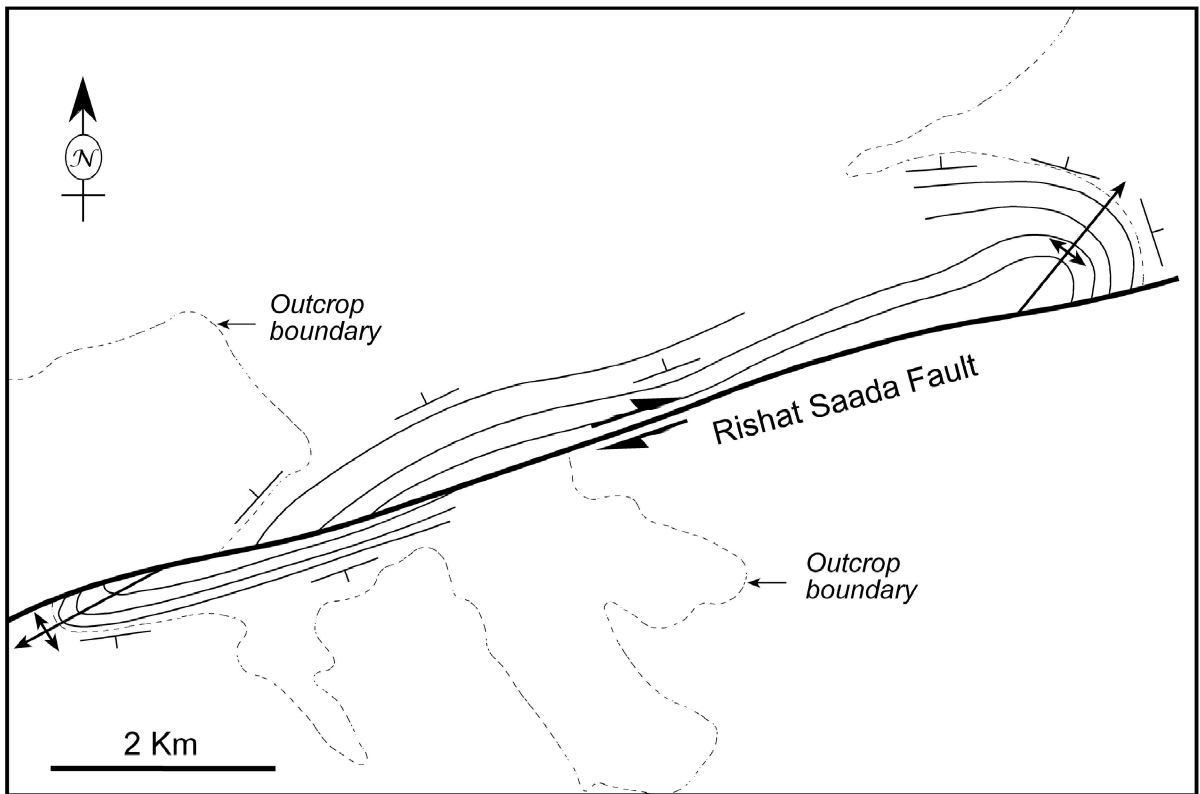

Fig. 1. Google Earth image © 2013 DigitalGlobe and structural form-line map of the Rishat Saada Fault showing deformation of the rocks on both sides of the fault.
