# Supplementary material
Source: publisher figshare collection journal article supplement (https://geolsoc.figshare.com/articles/dataset/_/3453575)
Supplement: Supplementary file 5 [file 1]

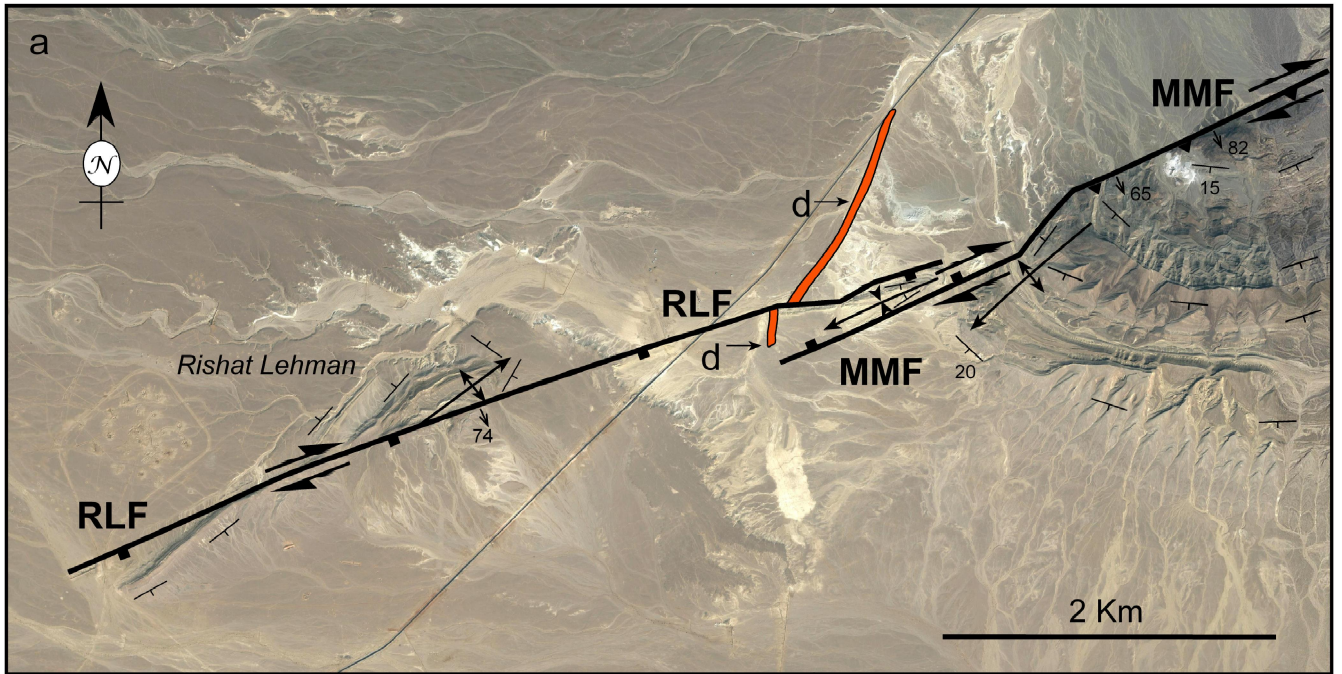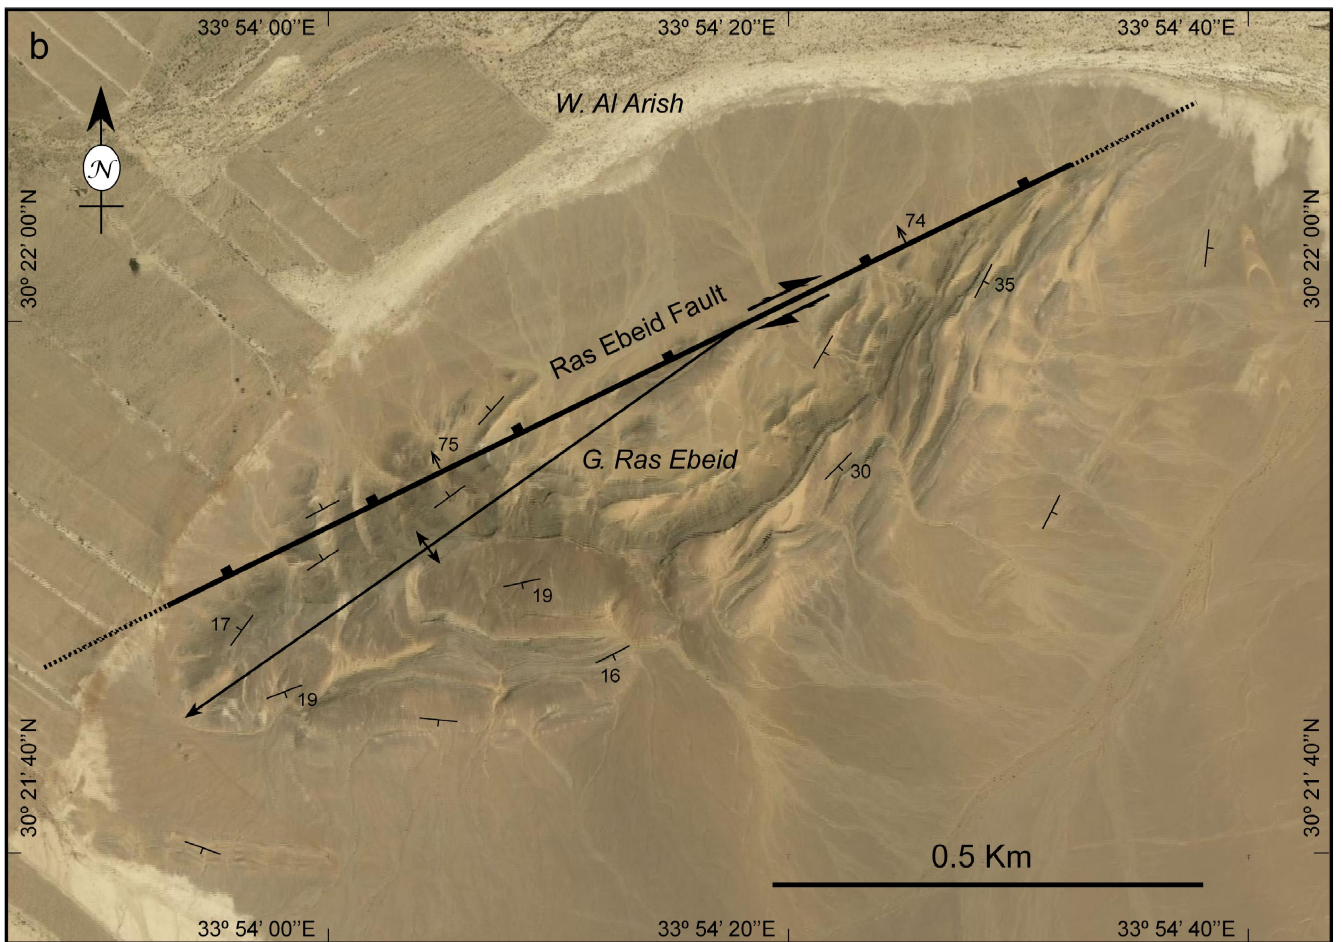

Fig. 2. (a) Google Earth image © 2013 DigitalGlobe of the Rishat Lehman Fault (RLF) and the southwestern part of the main Minsherah Fault (MMF). Lower Miocene basic igneous dike (d) is dextrally offset by the RLF for about 120 m. (b) Detailed Landsat TM image showing the structure of G. Ras Ebeid.
