# Supplementary material
Source: publisher figshare collection journal article supplement (https://geolsoc.figshare.com/articles/dataset/_/3453575)

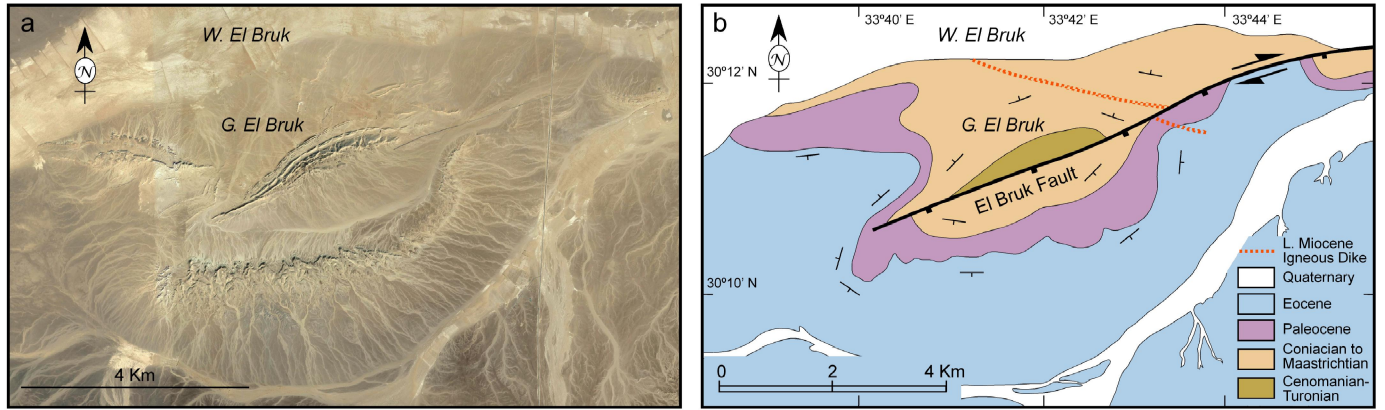

Fig. 5. Google Earth image © 2013 DigitalGlobe (a) and geological map (b) of El Bruk Fault area.

Supplement: Supplementary file 2 [file 1]

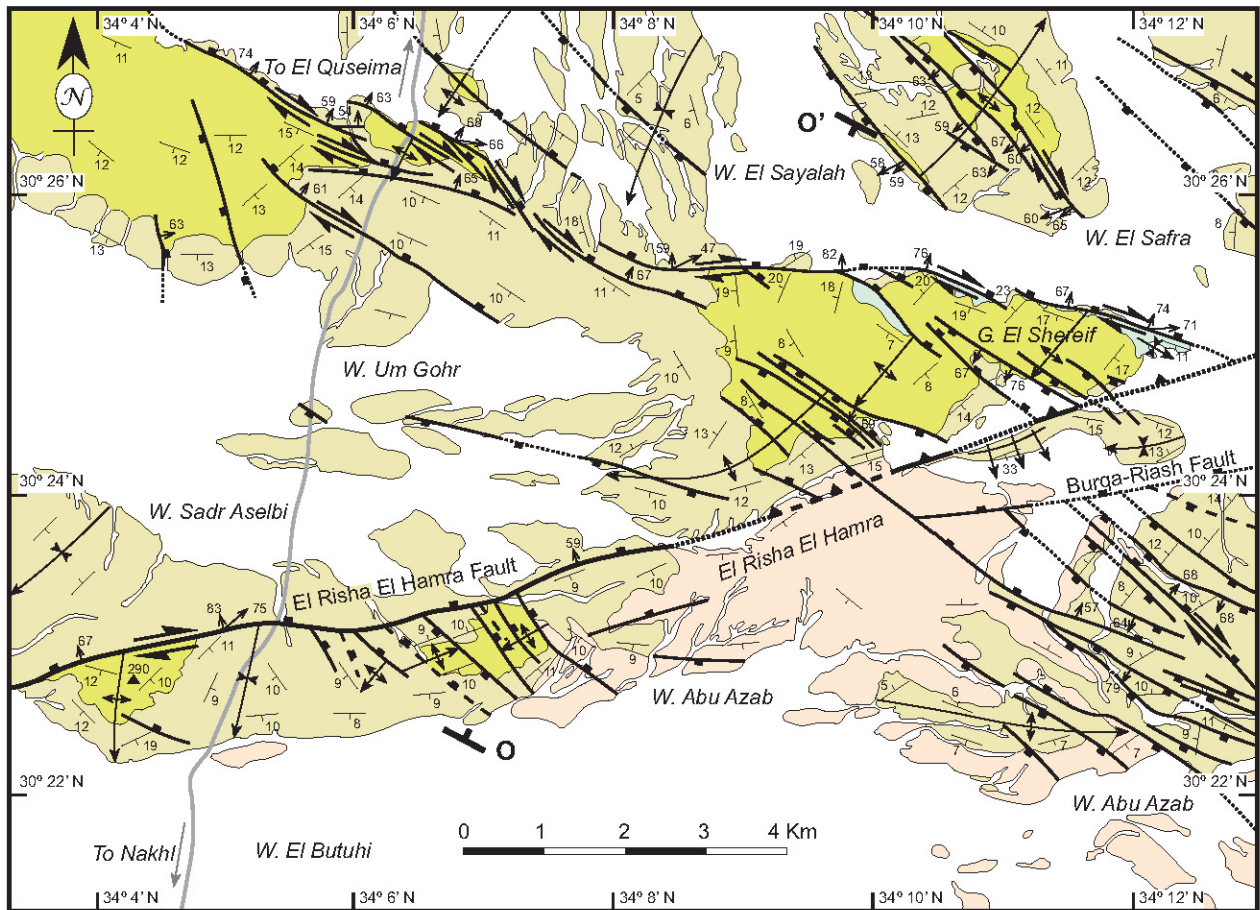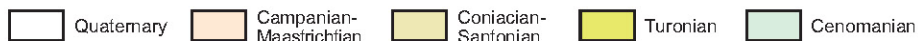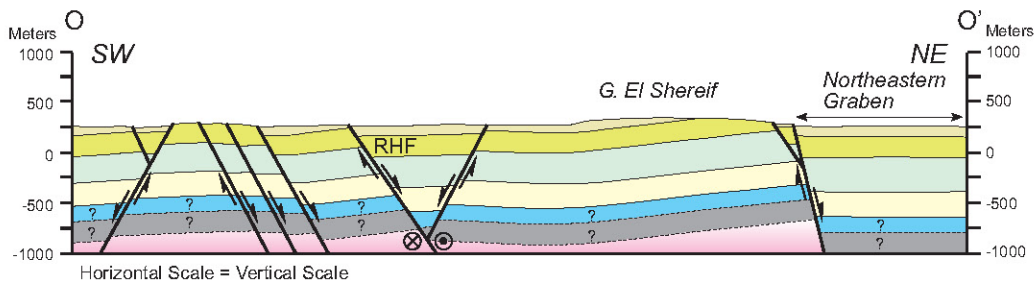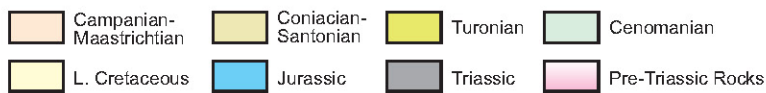

Fig. 3. Geological map and cross section of El Risha El Hamra Fault (RHF) and nearby area.

Supplement: Supplementary file 3 [file 1]
